# Supplementary material for: Next generation thermal insulators for operation in high-temperature and humid environments through aerogel carbonization
Source: Royal Society of Chemistry journal article supplement (doi:10.1039/d3tc00315a), 2023-01-01
Supplement: d3tc00315a1.pdf [file d3tc00315a1.pdf]

## Supplementary Information

### Next Generation of Thermal Insulators for High-Temperature and Humid Environments thru Aerogel Carbonization

Mohammed Alshrah<sup>1,2</sup>, Lun Howe Mark<sup>1</sup>, Piyapong Buahom<sup>1</sup>, Jung Hyub Lee<sup>1</sup>, Sasan Rezaei<sup>1</sup>,  
Hani E. Naguib<sup>3</sup>, Chul B. Park<sup>1\*</sup>

1. *Microcellular Plastics Manufacturing Laboratory, Department of Mechanical and Industrial Engineering, University of Toronto, 5 King's College Road, Toronto, Ontario, Canada, M5S 3G8*
2. *Department of Mechanical Engineering, Massachusetts Institute of Technology (MIT), Cambridge, MA 02139, USA*
3. *Smart and Adaptive Polymers & Composites Laboratory, Department of Mechanical and Industrial Engineering, University of Toronto, 5 King's College Road, Toronto, Ontario, Canada M5S 3G8*

\* Corresponding Author, [park@mie.utoronto.ca](mailto:park@mie.utoronto.ca)

### Calculation of the thermal conductivity of aerogels

The thermal conductivity of aerogel can be calculated from the contributions from thermal radiation and conduction, as follows:

$$\lambda_{total} = \lambda_{solid} + \lambda_{gas} + \lambda_{rad} \quad (S1)$$

where  $\lambda_{solid}$ ,  $\lambda_{gas}$  and  $\lambda_{rad}$  are the solid conductivity, gas conductivity, and radiative conductivity, respectively. The contributions from heat conduction through solid and gas are considered as the conductive thermal conductivity,  $\lambda_{cond} = \lambda_{solid} + \lambda_{gas}$ .

24 The solid thermal conductivity indicates the contribution from heat conduction through the  
25 solid, which can be calculated using an empirical correlation, as follows [1,2]:

$$\lambda_{solid} = \lambda_{s0} \left( \frac{\rho}{\rho_0} \right)^\alpha \quad (S2)$$

27 where  $\rho$  is the density of aerogel and  $\rho_0$  is the density of solid backbone (1,560 kg m<sup>-3</sup> for RF  
28 aerogel and 1,950 kg m<sup>-3</sup> for carbon aerogel).  $\lambda_{s0}$  is the thermal conductivity of solid backbone,  
29 which was taken as 0.18 W m<sup>-2</sup> K<sup>-1</sup> for RF aerogel [3] and as 0.7 W m<sup>-2</sup> K<sup>-1</sup> for carbon aerogel  
30 (adopted from the thermal conductivity of nano-sized graphite [4,5], which is in the same range of  
31 the thermal conductivity of activated carbon [5,6]). The semi-empirical constant  $\alpha$ , dependent on  
32 the random and complex pore structure, was taken as 1.2 for RF aerogel [7] and as 1.5 for carbon  
33 aerogel [8].

34 Based on the kinetic theory, the thermal conductivity of gaseous molecules in the porous  
35 structure can be calculated by the Knudsen model, as follows [9]:

$$\lambda_{gas} = \frac{1}{1 + 2C_1\Lambda_g/d} \lambda_{g0} \quad (S3)$$

37 Where  $\Lambda_g$  and  $\lambda_{g0}$  are, respectively, the mean free path and the thermal conductivity of gas in the  
38 bulk conduction (67 nm and 0.026 W m<sup>-1</sup> K<sup>-1</sup>, respectively, for air at 300 K and 1 bar).  $d$  is the  
39 mean pore size. Modified from the value around 2 for thermal transport of gas molecules confined  
40 by two parallel walls [9,10], the dimensionless coefficient  $C_1$ , was taken as 1.0, based on semi-  
41 empirical fitting for the complex aerogel structures from experimental observation and those  
42 generated by the Direct Simulation Monte Carlo (DSMC) simulation [11].

43 The radiative thermal conductivity can be expressed as [3]:

$$44 \quad \lambda_{rad} = \frac{16n^2\sigma T^3}{3\rho K_s/\rho_0} \quad (S4)$$

45 where  $\sigma$  is the Stefan-Boltzmann constant ( $5.67037 \times 10^{-8} \text{ W m}^{-2} \text{ K}^{-4}$ ).  $T$  is the mean absolute  
46 temperature.  $n$  is the refractive index of aerogel, around 1.1, calculated by  
47  $n = 1 + (n_0 - 1)\rho/\rho_0$ , with  $n_0$  being the refractive index of solid backbone [12].  $K_s$  is the mean  
48 Rosseland extinction coefficient of aerogel. The specific extinction coefficient, i.e. the ratio of the  
49 mean extinction coefficient to the density of solid backbone,  $K_s/\rho_0$ , was taken as  $50.1 \text{ m}^2 \text{ kg}^{-1}$  for  
50 RF aerogel [1] and  $1,000 \text{ m}^2 \text{ kg}^{-1}$  for carbon aerogel [3].

51 **Figure S1** shows the calculated values of the total thermal conductivity and the  
52 contributions from radiation and conduction through gas and solid for the RF aerogel and carbon  
53 aerogel samples. **Figure S2** shows the calculated thermal conductivity of RF aerogel and carbon  
54 aerogels as a function of the relative density.

55

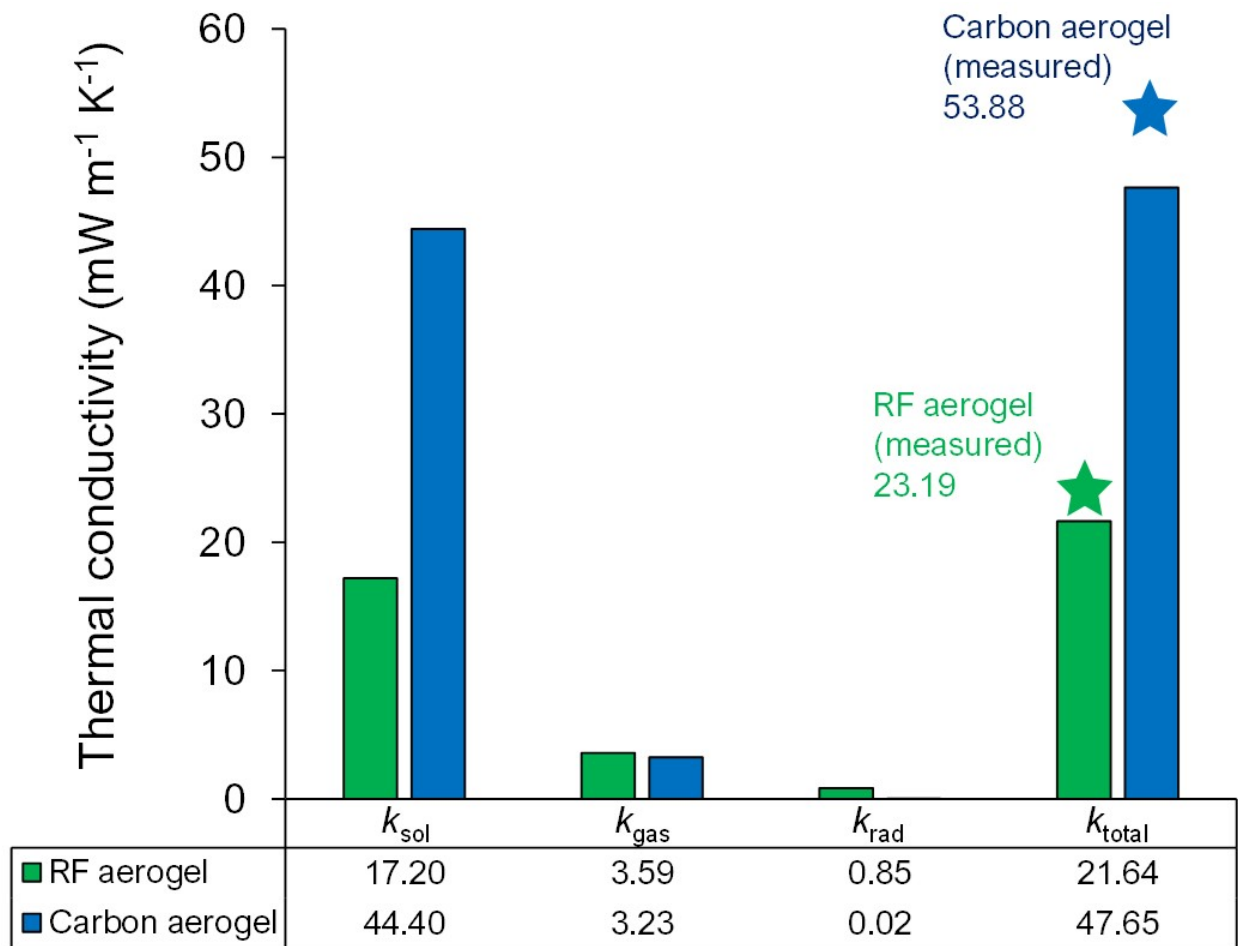

56

57 **Figure S1.** The calculated and measured thermal conductivities of RF aerogel and carbon aerogel  
 58 samples.

59

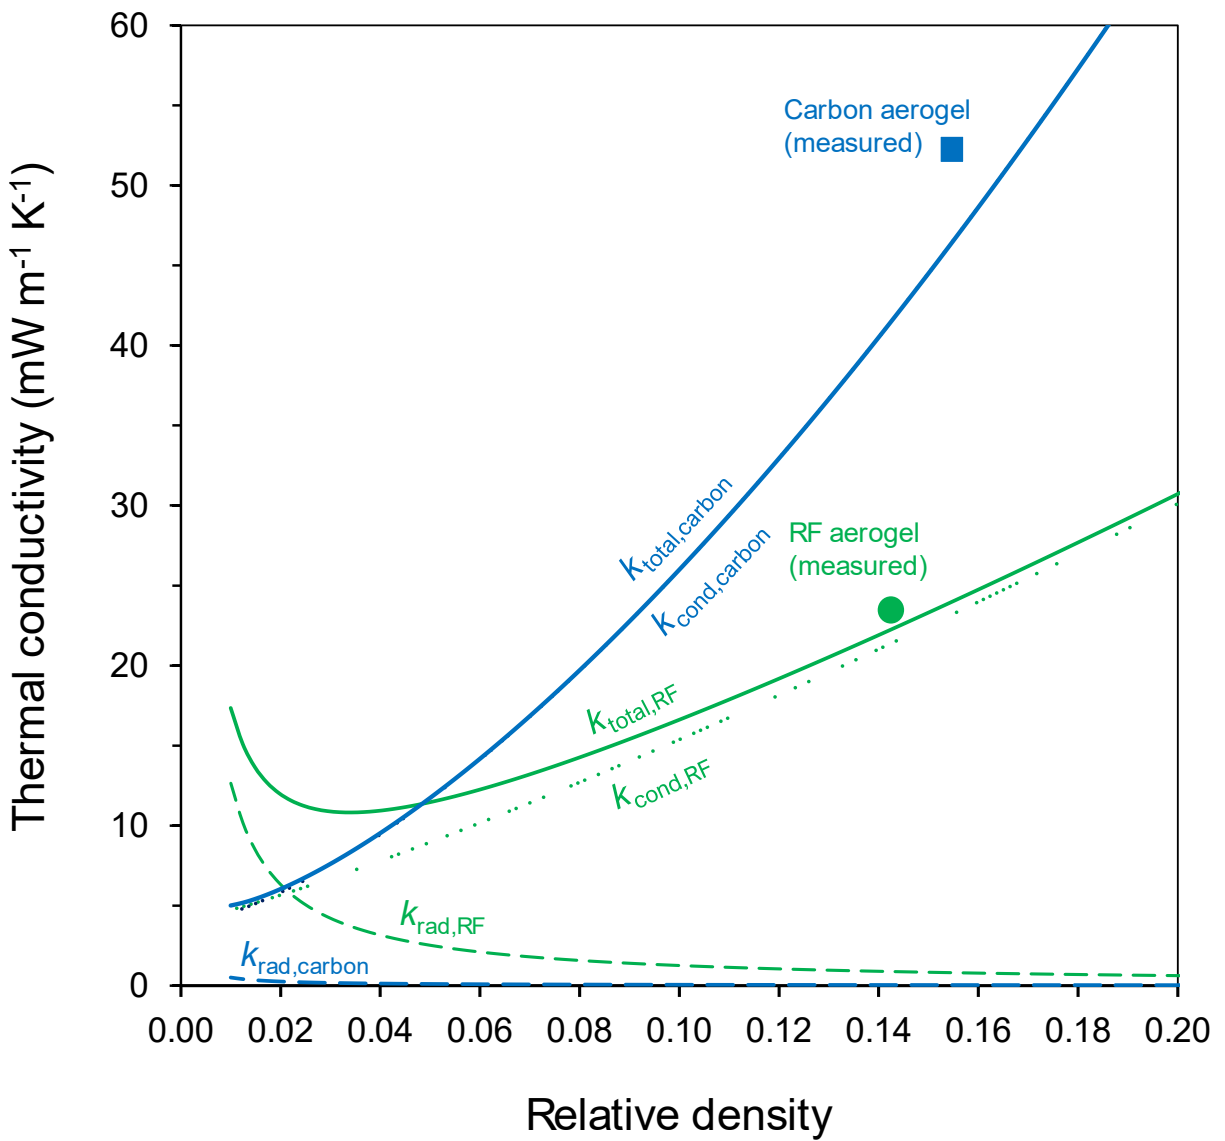

60

61 **Figure S2.** The calculated thermal conductivity of RF aerogel and carbon aerogel as a function of  
 62 the relative density.

63

64

65

## 66 References

- 67 [1] X. Lu, M.C. Arduini-Schuster, J. Kuhn, O. Nilsson, J. Fricke, R.W. Pekala, Thermal  
68 conductivity of monolithic organic aerogels, *Science*. 255 (1992) 971–972.  
69 <https://doi.org/10.1126/science.255.5047.971>.
- 70 [2] X. Lu, P. Wang, M.C. Arduini-Schuster, J. Kuhn, D. Büttner, O. Nilsson, U. Heinemann, J.  
71 Fricke, Thermal transport in organic and opacified silica monolithic aerogels, *J. Non-Cryst.*  
72 *Solids*. 145 (1992) 207–210. [https://doi.org/10.1016/S0022-3093\(05\)80457-0](https://doi.org/10.1016/S0022-3093(05)80457-0).
- 73 [3] L.W. Hrubesh, R.W. Pekala, Thermal properties of organic and inorganic aerogels, *J.*  
74 *Mater. Res.* 9 (1994) 731–738. <https://doi.org/10.1557/JMR.1994.0731>.
- 75 [4] M. Harb, C. von Korff Schmising, H. Enquist, A. Jurgilaitis, I. Maximov, P.V. Shvets, A.N.  
76 Obraztsov, D. Khakhulin, M. Wulff, J. Larsson, The c-axis thermal conductivity of graphite  
77 film of nanometer thickness measured by time resolved X-ray diffraction, *Appl. Phys. Lett.*  
78 101 (2012) 233108. <https://doi.org/10.1063/1.4769214>.
- 79 [5] A. Ertas, C.T.R. Boyce, U. Gulbulak, Experimental measurement of bulk thermal  
80 conductivity of activated carbon with adsorbed natural gas for ANG energy storage tank  
81 design application, *Energies*. 13 (2020) 682. <https://doi.org/10.3390/en13030682>.
- 82 [6] R.E. Critoph, L. Turner, Heat transfer in granular activated carbon beds in the presence of  
83 adsorbable gases, *Int. J. Heat Mass Transf.* 38 (1995) 1577–1585.  
84 [https://doi.org/10.1016/0017-9310\(94\)00276-2](https://doi.org/10.1016/0017-9310(94)00276-2).
- 85 [7] X. Lu, R. Caps, J. Fricke, C.T. Alviso, R.W. Pekala, Correlation between structure and  
86 thermal conductivity of organic aerogels, *J. Non-Cryst. Solids*. 188 (1995) 226–234.  
87 [https://doi.org/10.1016/0022-3093\(95\)00191-3](https://doi.org/10.1016/0022-3093(95)00191-3).
- 88 [8] L. Wang, J. Feng, Y. Jiang, L. Li, J. Feng, Thermal conductivity of  
89 polyvinylpolymethylsiloxane aerogels with high specific surface area, *RSC Adv.* 9 (2019)  
90 7833–7841. <https://doi.org/10.1039/C8RA10493J>.
- 91 [9] M. Knudsen, Die molekulare Wärmeleitung der Gase und der Akkommodationskoeffizient,  
92 *Ann. Phys.* 339 (1911) 593–656. <https://doi.org/10.1002/andp.19113390402>.
- 93 [10] S. Sonnack, M. Meier, G. Ünsal-Peter, L. Erlbeck, H. Nirschl, M. Rädle, Thermal  
94 accommodation in nanoporous silica for vacuum insulation panels, *Int. J. Thermofluids*. 1–  
95 2 (2020) 100012. <https://doi.org/10.1016/j.ijft.2019.100012>.
- 96 [11] Z.-Y. Li, C.-Y. Zhu, X.-P. Zhao, A theoretical and numerical study on the gas-contributed  
97 thermal conductivity in aerogel, *Int. J. Heat Mass Transf.* 108 (2017) 1982–1990.  
98 <https://doi.org/10.1016/j.ijheatmasstransfer.2017.01.051>.
- 99 [12] J.S.Q. Zeng, R. Greif, P. Stevens, M. Ayers, A. Hunt, Effective optical constants  $n$  and  $\kappa$   
100 and extinction coefficient of silica aerogel, *J. Mater. Res.* 11 (1996) 687–693.  
101 <https://doi.org/10.1557/JMR.1996.0083>.

102

103
